# Supplementary material for: Identification of CKS2 as a novel prognostic biomarker and potential therapeutic target for oral squamous cell carcinoma
Source: PubMed Central journal article supplement — Transl Cancer Res. 2023 Sep 12;12(9):2276–93. doi: 10.21037/tcr-23-511 (PMC10583009; doi:10.21037/tcr-23-511), 2023-09-12
Supplement: tcr-12-09-2276-supplementary.pdf [file tcr-12-09-2276-supplementary.pdf]

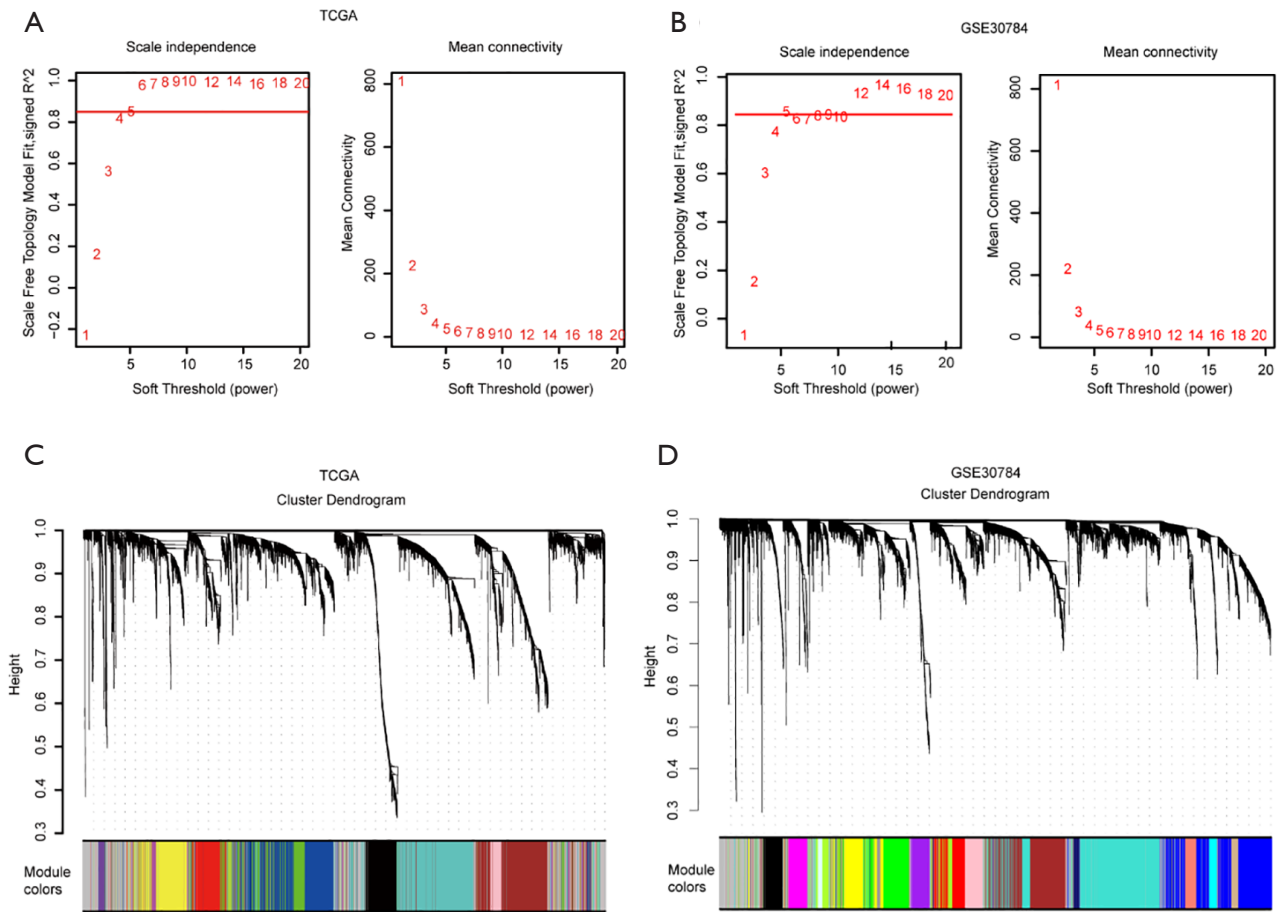

**Figure S1** Construction of the weighted gene co-expression network in TCGA-OSCC dataset and GSE30784 dataset. (A,B) Analysis of the scale free fit index and the mean connectivity for various soft threshold power. (C,D) Hierarchical clustering tree developed by gene dissimilarity based on topological overlap. TCGA, The Cancer Genome Atlas; OSCC, oral squamous cell carcinoma.
